**Comparative study of the lymphocyte change between COVID-19 and non-COVID-19 pneumonia cases suggesting uncontrolled inflammation might not be the main reason of tissue injury**

Yishan Zheng, Zhen Huang, Guoping Yin, Xia Zhang, Wei Ye, Zhiliang Hu, Chunmei Hu, Hongxia Wei, Yi Zeng, Yun Chi, Cong Cheng, Feishen Lin, Hu Lu, Lingyan Xiao, Yan Song, Chunming Wang, Yongxiang Yi, Lei Dong

**Disclaimer statement**

The authors have withdrawn this manuscript because the statistical methods in our manuscript need to be modified and we are going to improve the statistical methods and try to give more precise model. Therefore, the authors do not wish this work to be cited as reference for the project. If you have any questions, please contact the corresponding author.
